# Supplementary material
Source: Springer Nature journal article supplement (https://www.springermedizin.de/resource/supplementary/12902_2008_69_MOESM2_ESM.pdf/9516170)

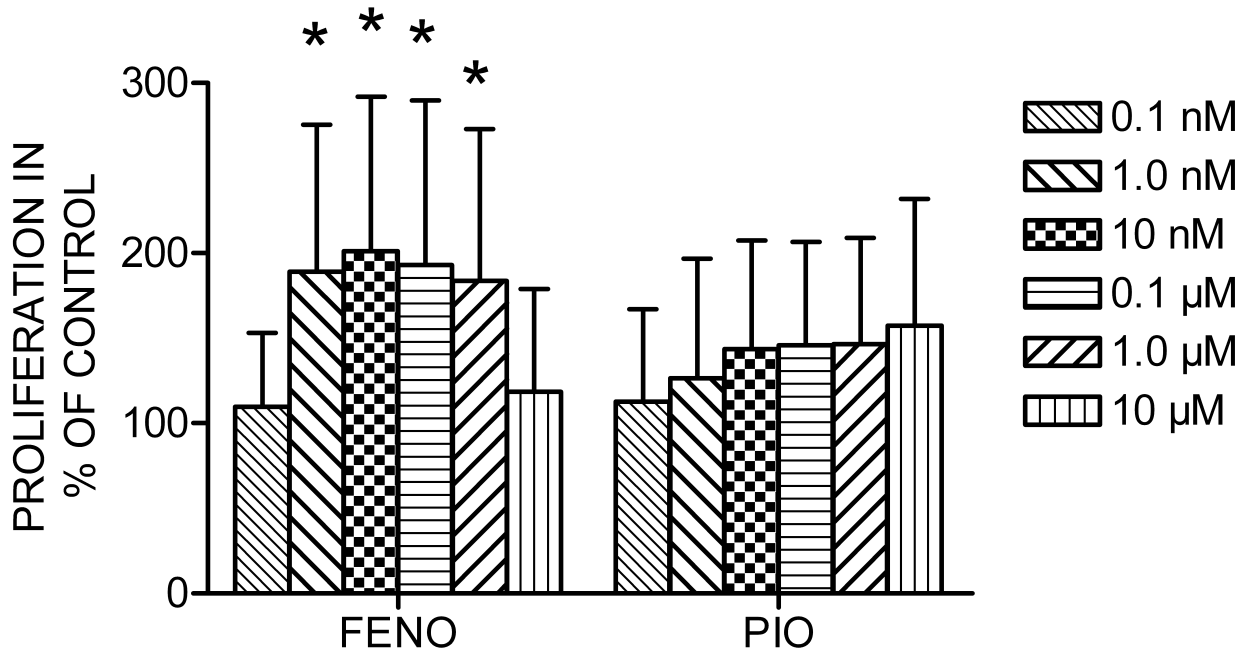

Supplement: MOESM2 [file 9516170]
